# Supplementary material for: Hepatoprotective Activity of Lignin-Derived Polyphenols Dereplicated Using High-Resolution Mass Spectrometry, In Vivo Experiments, and Deep Learning
Source: MDPI journal article supplement (doi:10.3390/ijms232416025), 2022-12-16
Supplement: s1 [file s1]

## Supporting Information

### **Hepatoprotective Activity of Lignin-Derived Polyphenols Dereplicated Using High-Resolution Mass Spectrometry, In Vivo Experiments, and Deep Learning**

Alexey Orlov <sup>1</sup>, Savva Semenov <sup>1,2</sup>, Gleb Rukhovich <sup>1</sup>, Anastasia Sarycheva <sup>1</sup>, Oxana Kovaleva <sup>1</sup>, Alexander Semenov <sup>3</sup>, Elena Ermakova <sup>3</sup>, Ekaterina Gubareva <sup>3</sup>, Anna E. Bugrova <sup>4</sup>, Alexey Kononikhin <sup>1</sup>, Elena I. Fedoros <sup>3</sup>, Evgeny Nikolaev <sup>1,\*</sup> and Alexander Zhrebker <sup>1,\*</sup>

<sup>1</sup> Skolkovo Institute of Science and Technology, 30 Bolshoy Boulevard bld. 1, 121205 Moscow, Russia

<sup>2</sup> Moscow Institute of Physics and Technology, 141701 Moscow, Russia

<sup>3</sup> N.N. Petrov National Medical Research Center of Oncology, 68 Leningradskaya str, 197758 Saint Petersburg, Russia

<sup>4</sup> Emanuel Institute for Biochemical Physics, Russian Academy of Sciences, 119334 Moscow, Russia

\* Correspondence: e.nikolaev@skoltech.ru (E.N.); a.zhrebker@skoltech.ru (A.Z.)

#### **This file includes**

Pages: 15

Figures S1 to S8

Tables: S3 to S8

Legend for Tables S1-S2

**Other Supporting Information for this manuscript:**

Table S1, S2 (separate xlsx file)

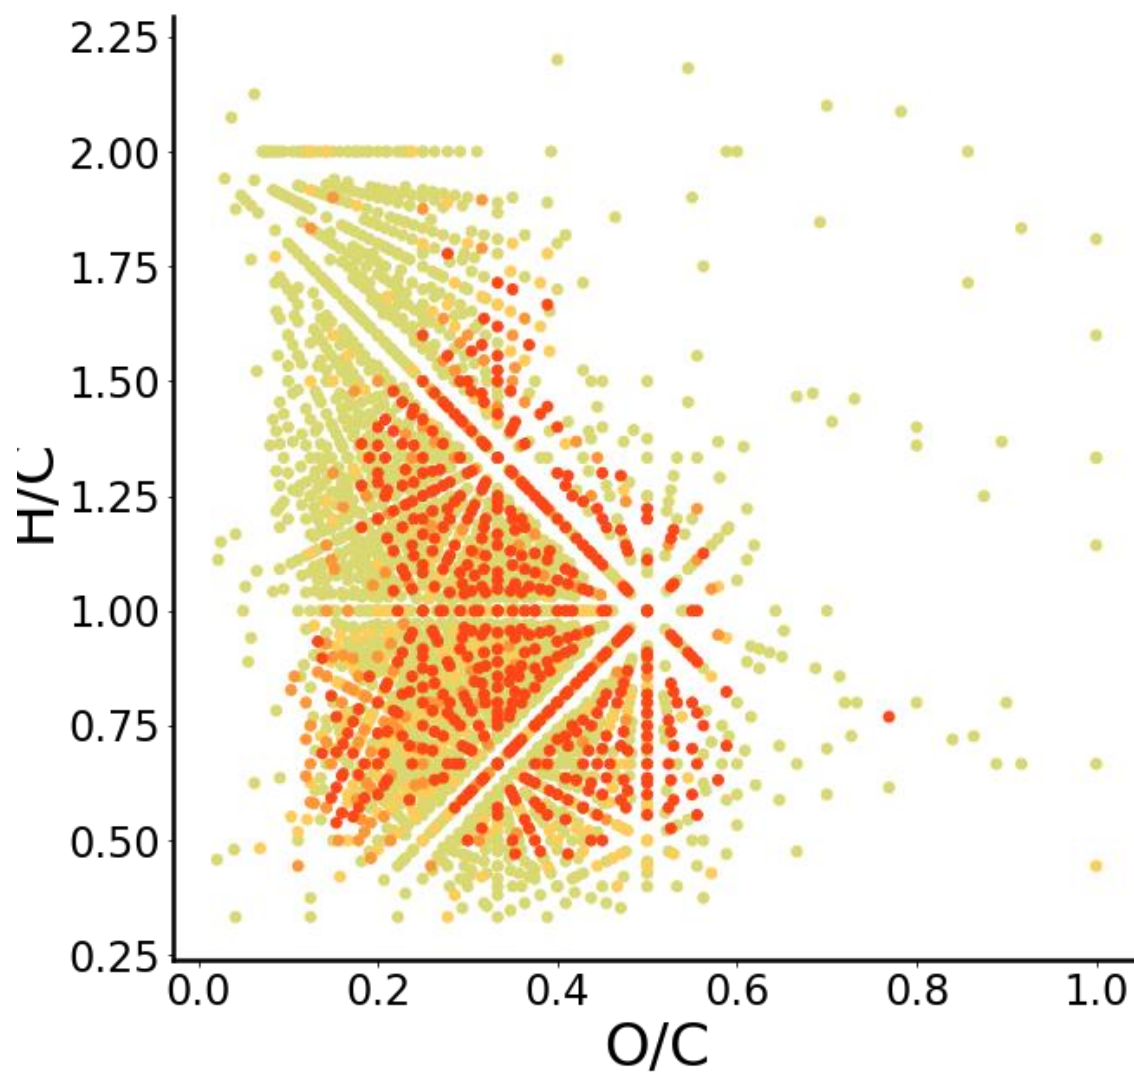

**Figure S1.** Van Krevelen diagrams for BP-Cx-1. The color scheme is related to the number of H/D exchanges in NaOD: pale green – 0, yellow – 1, orange – 2, red –  $\geq 3$ .

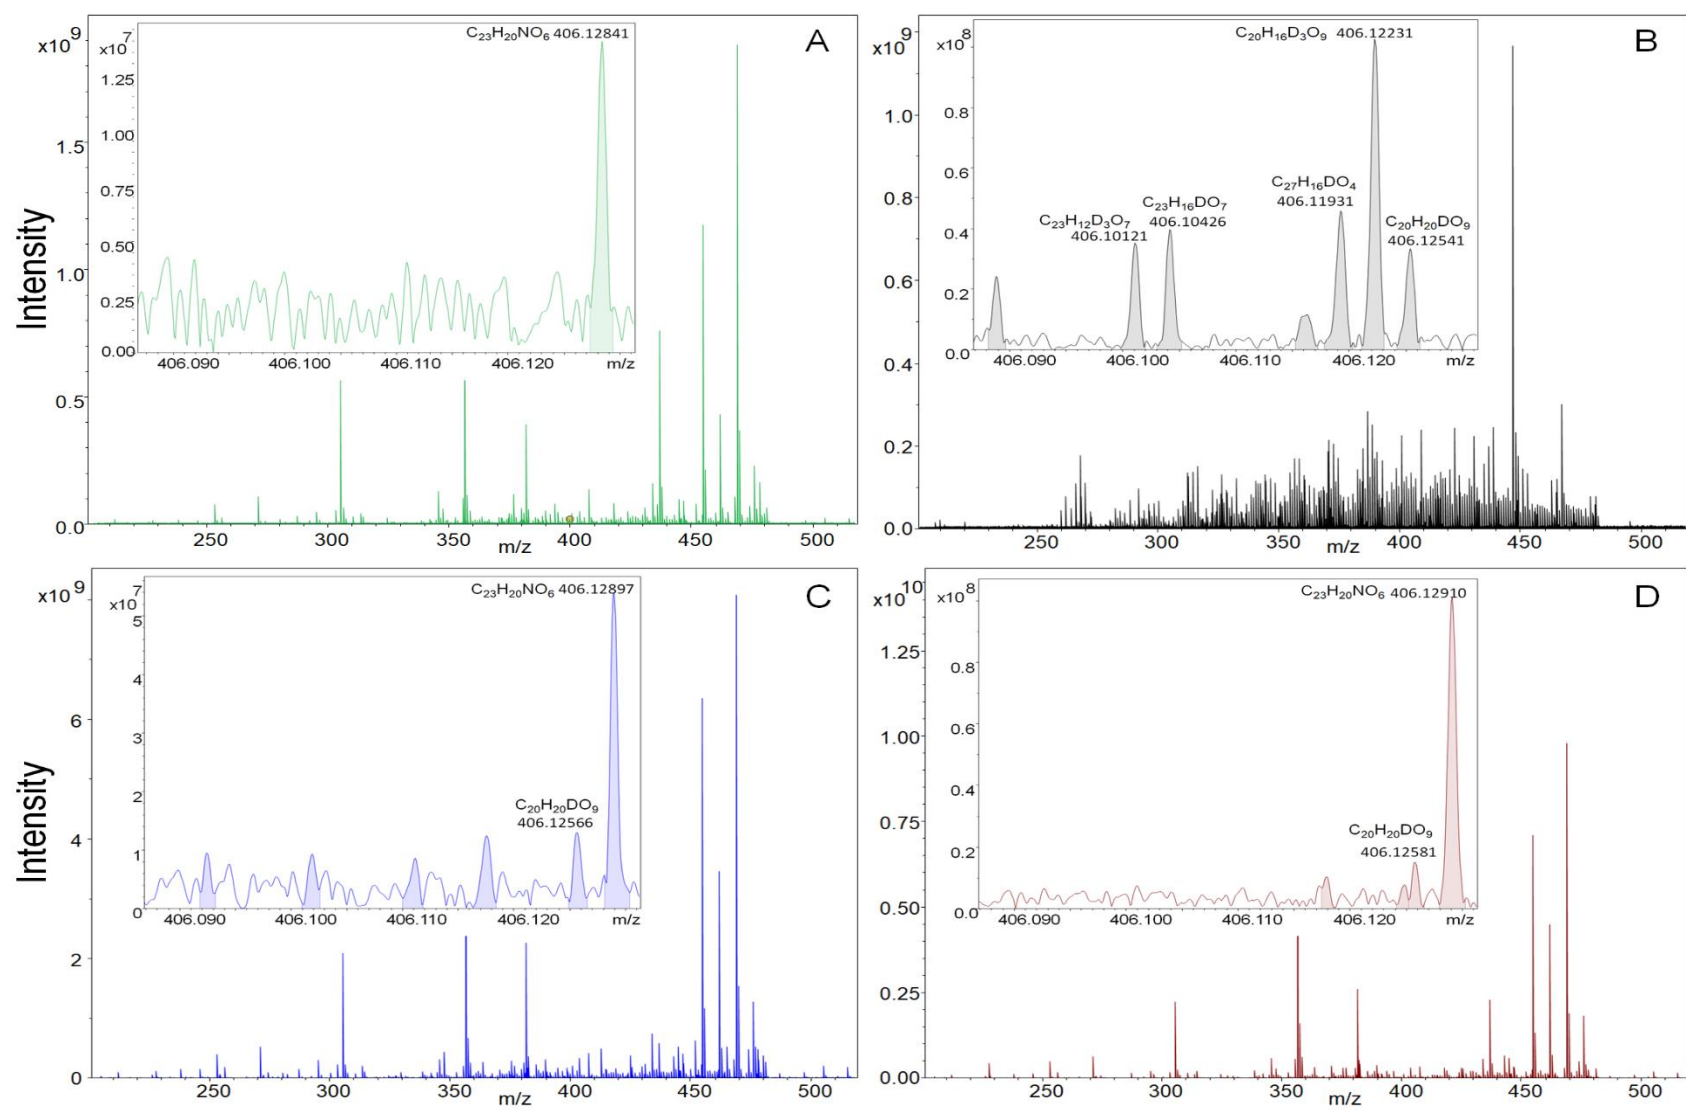

**Figure S2.** Q-isolated FTICR mass-spectra of A) control liver extract, B) D-labeled BP-Cx-1, C,D) Liver extract after intravenous and gavage administration of D-labeled BP-Cx-1, respectively. Insets include magnified mass-spectra region with clear D-containing ion, which was absent in control sample

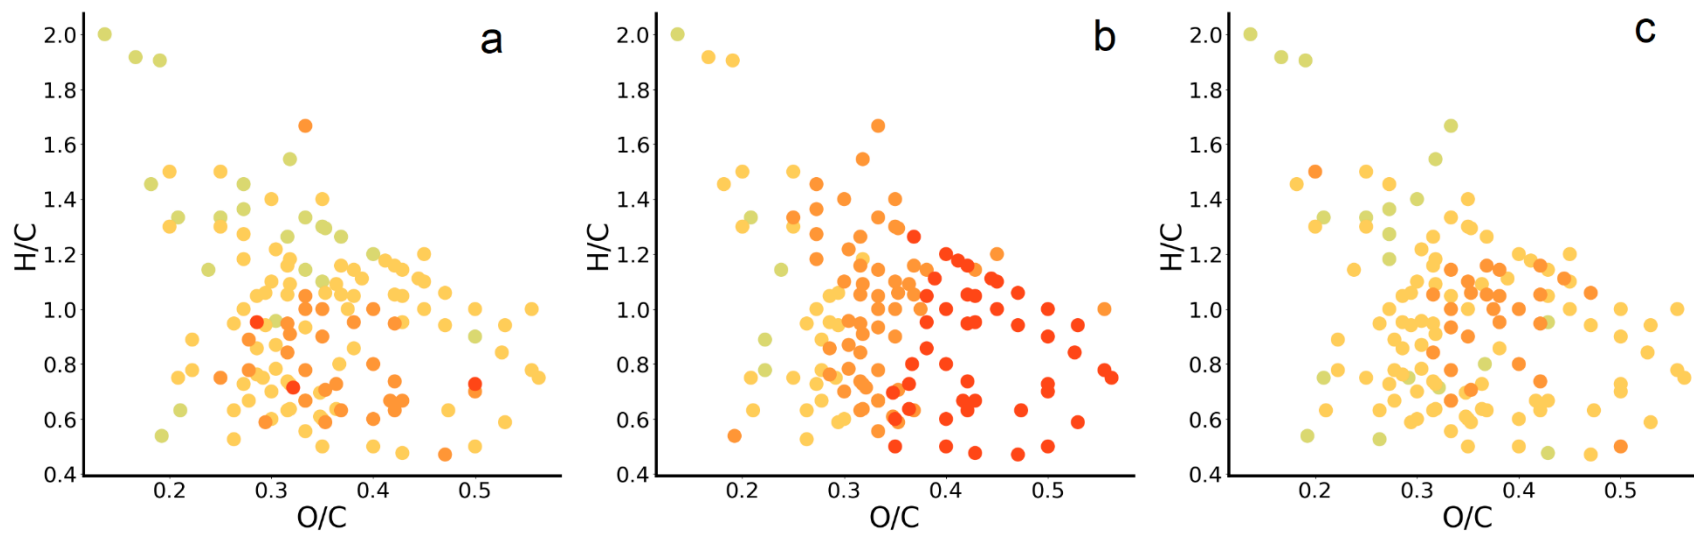

**Figure S3.** Van Krevelen diagrams for 133 molecular components of BP-Cx-1 detected in liver. The color scheme is related to the number of detected structural moieties (**a** – carbonyl, **b** – carboxyl, **c** – aromatic rings): pale green – 0, yellow – 1, orange – 2, red –  $\geq 3$ .

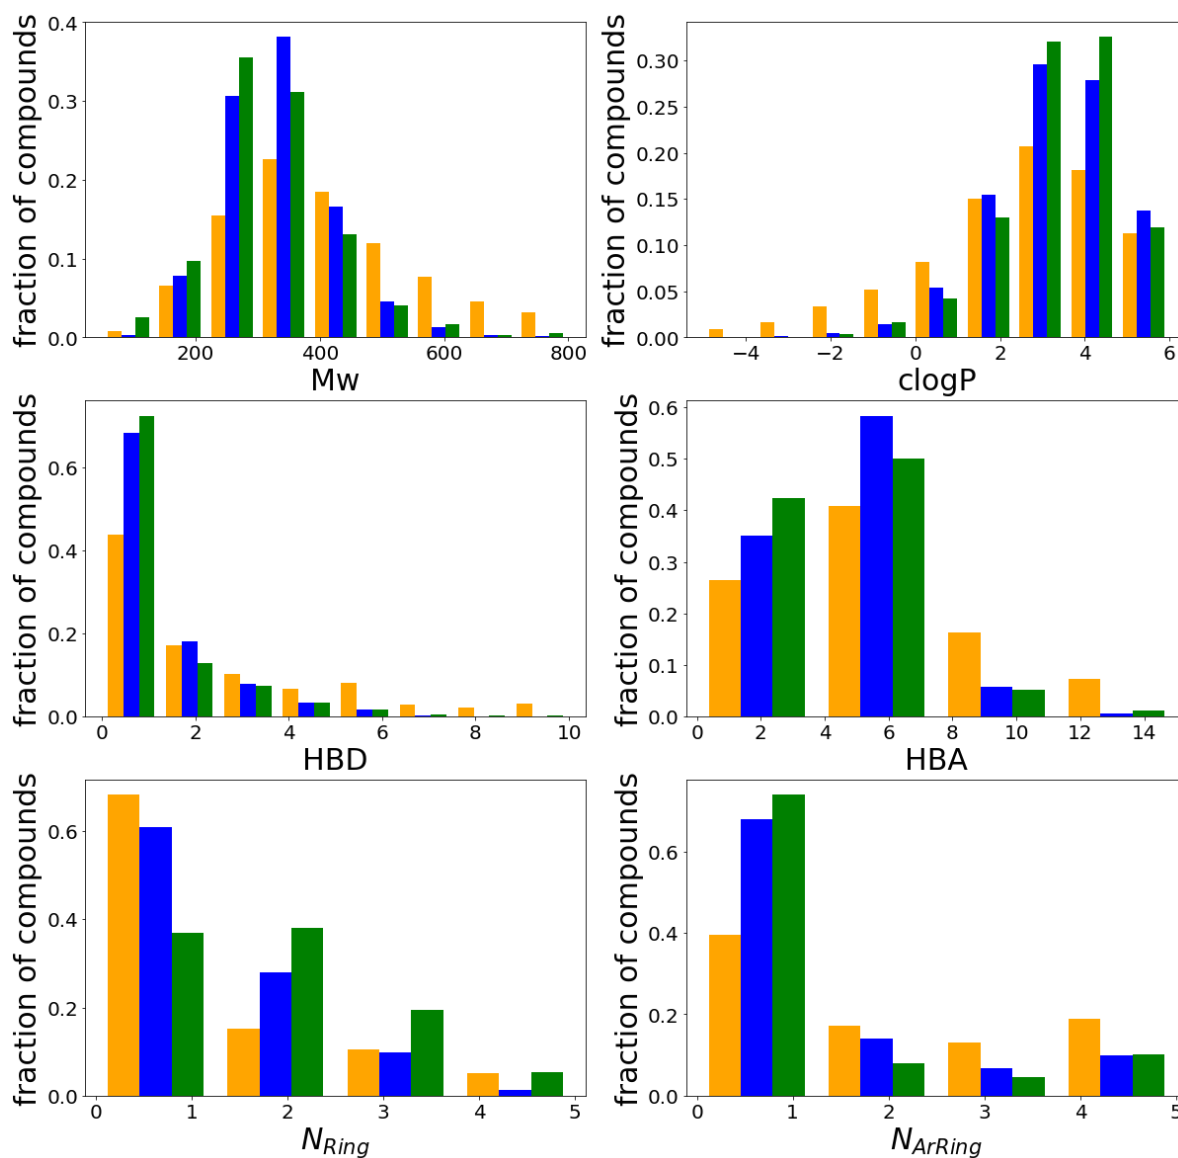

**Figure S4.** Distribution of molecular descriptors of compounds from CoCoNut  $C_xH_yO_z$  subset (orange), ChEMBL compounds active against Nrf2 (green), generated compounds (blue). a Molecular weight (Mw), b calculated lipophilicity (clogP), c number of hydrogen bond donors (HBD), d number of hydrogen bond acceptors (HBA), e number of aliphatic rings ( $N_{Ring}$ ), f number of aromatic rings ( $N_{ArRing}$ ).

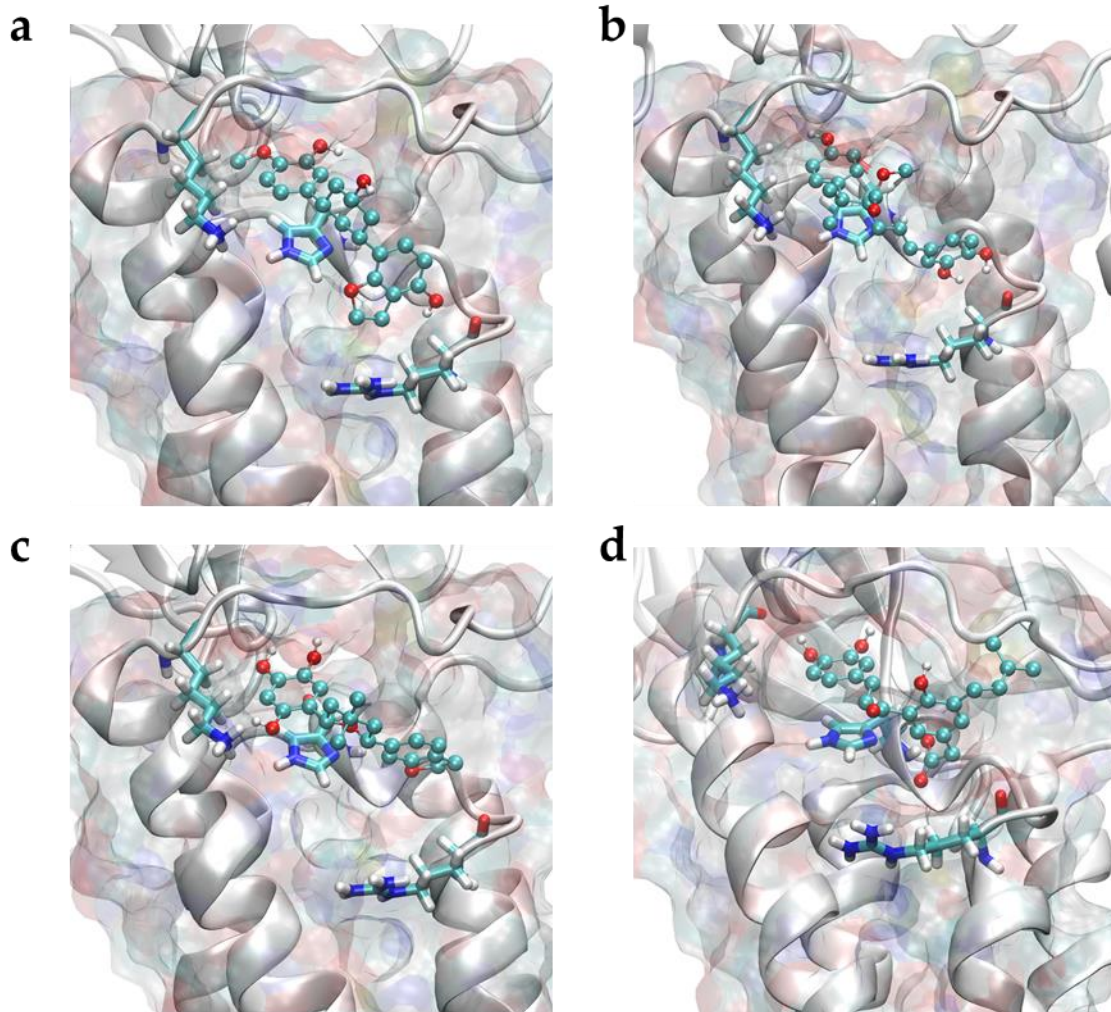

**Figure S5.** Top scoring binding poses. a compound 1, b compound 2, c compound 3, d compound 4



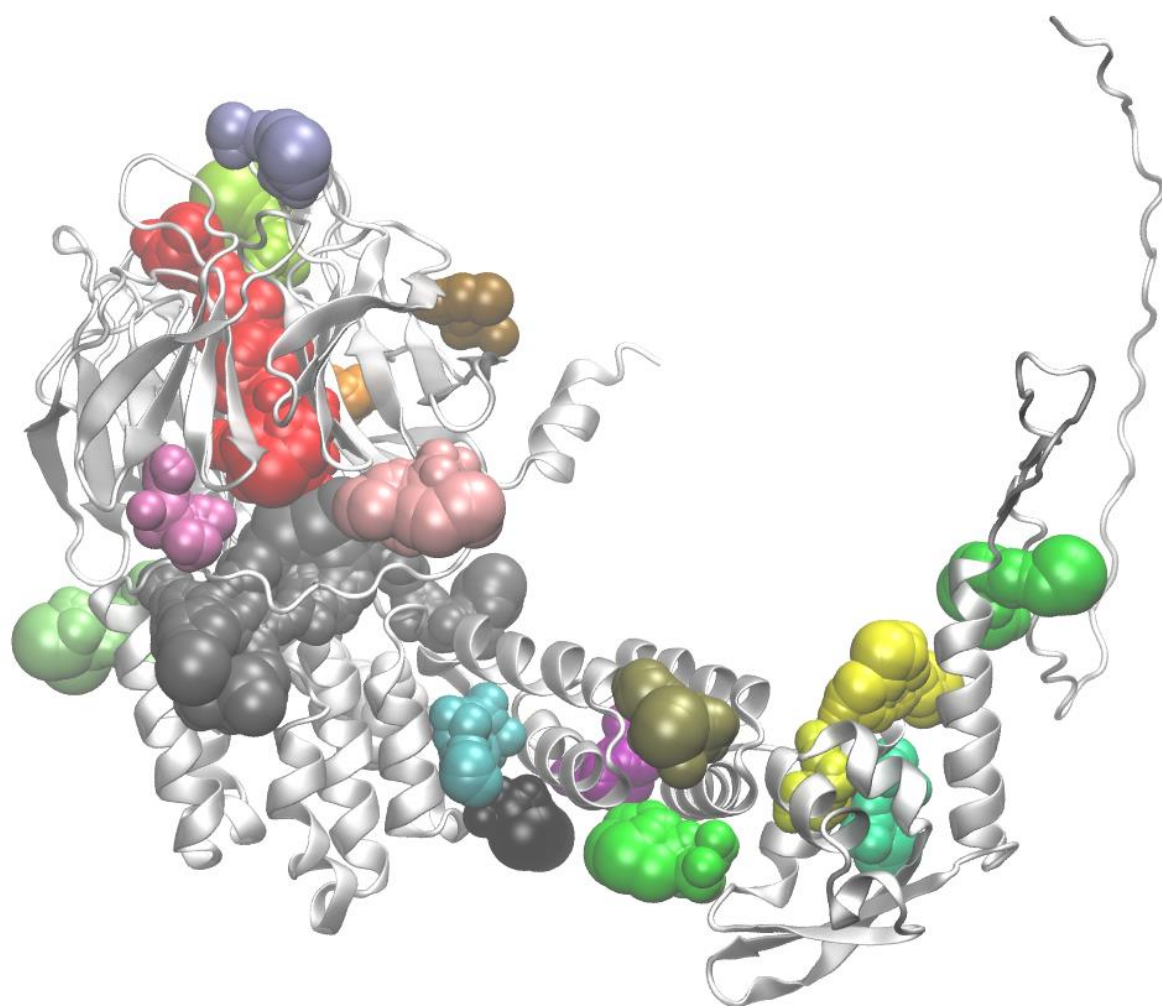

**Figure S6.** Cavities (shown as spheres) on the surface of a full-length KEAP1 model predicted by fpocket2.

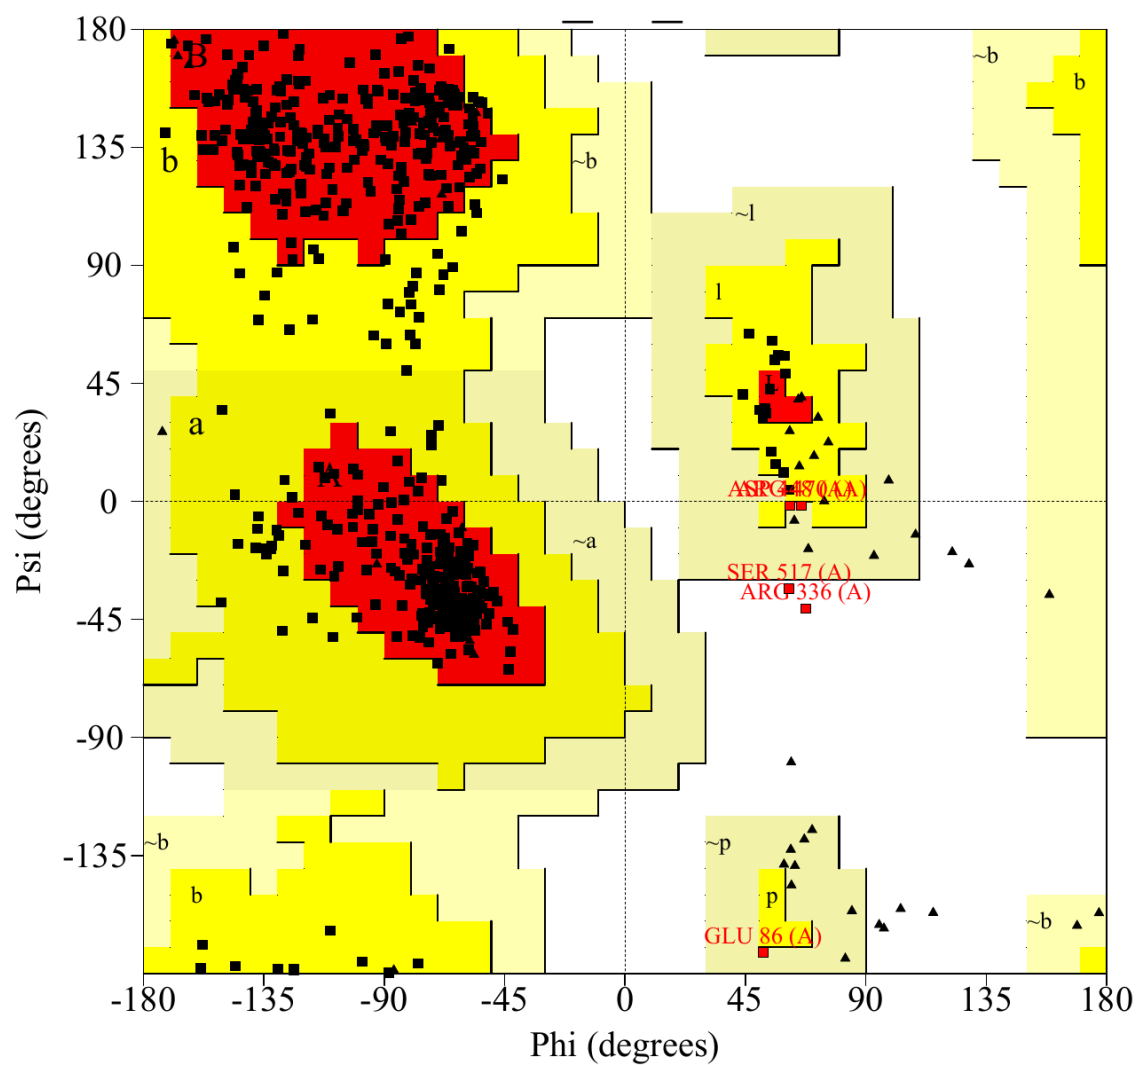

**Figure S7.** Screenshot of a Ramachandran plot obtained with PROCHECK 2.3. Residues from disallowed regions (Arg470, Glu86, Ser517, Arg336, Asp448) are labeled.



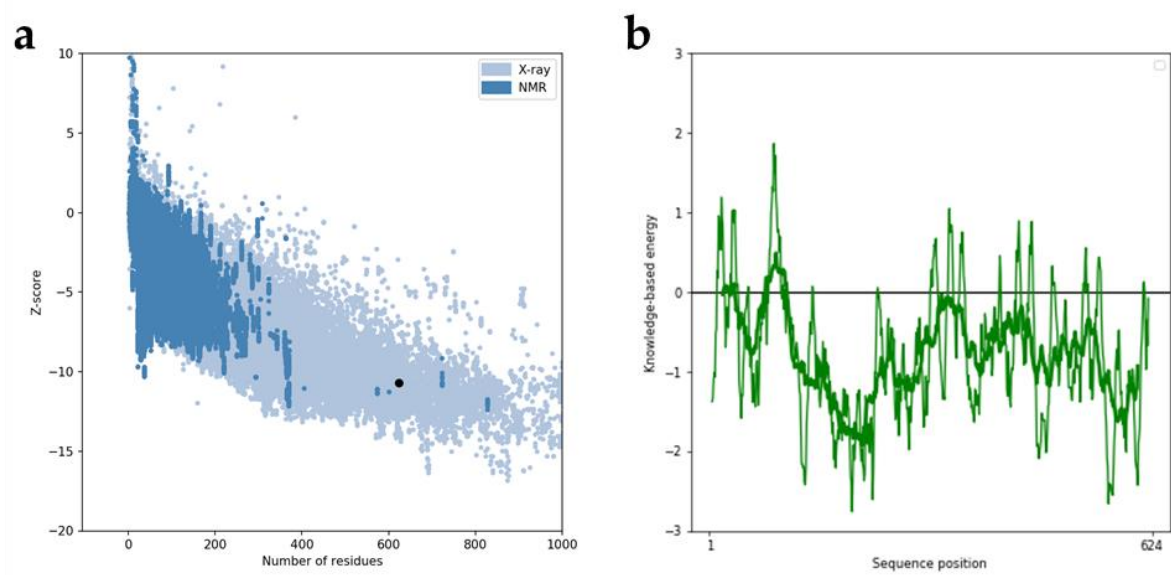

**Figure S8. a.** Screenshot of ProSA-web z-score plot for the full-length KEAP1 model. The z-score (-10.71) indicates overall model quality. Its value is displayed in a plot that contains the z-scores of all experimentally determined protein chains (X-ray (pale blue), NMR (blue)) in current PDB. **b.** Screenshot of ProSA-web plot of residue scores for the full-length KEAP1 model. This plot shows local model quality by plotting energies as a function of amino acid sequence position  $i$ . Smoothing window of 40 residues was used.

**Tables S1.** Results on H/D exchange of BP-Cx-1 in NaOD as measured by FTICR MS

**Tables S2.** BP-Cx-1 components determined in liver with structural features as determined by FTICR MS and isotope tagging

**Tables S3.** Number-averaged values of FTICR MS-derived data on BP-Cx-1 fractions

| Fraction | Mn     | (Al <sub>con</sub> )n | DBEn  | (H/C)n | (O/C)n |
|----------|--------|-----------------------|-------|--------|--------|
| MeOH100  | 459.44 | 0.45                  | 13.01 | 1.08   | 0.31   |
| MeOH75   | 527.59 | 0.57                  | 17.70 | 0.87   | 0.31   |
| MeOH50   | 492.33 | 0.59                  | 17.58 | 0.83   | 0.30   |
| MeOH25   | 438.06 | 0.48                  | 14.13 | 1.02   | 0.27   |

**Tables S4.** Contribution of Al<sub>con</sub>-based classes of BP-Cx-1 fractions obtained by FTICR MS

| Fraction | NumForm | N-containing | Aliphatics | unsaturated<br>(O/C<0.5) | unsaturated<br>(O/C≥0.5) | aromatic<br>(O/C<0.5) | aromatic<br>(O/C≥0.5) | condensed<br>(O/C<0.5) | condensed<br>(O/C≥0.5) |
|----------|---------|--------------|------------|--------------------------|--------------------------|-----------------------|-----------------------|------------------------|------------------------|
| MeOH100  | 5927    | 0.85%        | 1.67%      | 30.98%                   | 0.18%                    | 56.75%                | 0.71%                 | 8.64%                  | 0.21%                  |
| MeOH75   | 4379    | 0.03%        | 0.05%      | 15.59%                   | 0.02%                    | 67.32%                | 0.11%                 | 16.81%                 | 0.06%                  |
| MeOH50   | 4546    | 0.08%        | 0.85%      | 6.88%                    | 0.07%                    | 57.40%                | 0.16%                 | 34.52%                 | 0.03%                  |
| MeOH25   | 3676    | 0.31%        | 1.55%      | 9.82%                    | 0.20%                    | 48.80%                | 0.31%                 | 38.96%                 | 0.05%                  |

**Tables S5.** Body weight of female mice with induced NAFLD accompanied by type 2 diabetes, g, (M±m)

| Group                                                                                                                                                                                                                                                      | Week     |          |          |          |          |          |          |          |
|------------------------------------------------------------------------------------------------------------------------------------------------------------------------------------------------------------------------------------------------------------|----------|----------|----------|----------|----------|----------|----------|----------|
|                                                                                                                                                                                                                                                            | 0        | 1*       | 2        | 3**      | 4***     | 5        | 6        | 7        |
| 1                                                                                                                                                                                                                                                          | 26,3±0,6 | 26±0,4   | 26,3±0,5 | 26,6±0,5 | 26,4±0,5 | 27,1±0,5 | 27,3±0,5 | 25,9±0,4 |
| 2                                                                                                                                                                                                                                                          | 25,7±0,4 | 25,6±0,5 | 25,5±0,3 | 22,8±0,3 | 21±0,5   | 21,4±0,9 | 22±1,0   | 20,2±0,8 |
| 3                                                                                                                                                                                                                                                          | 25,9±0,7 | 25,5±0,8 | 25,9±0,6 | 21,8±0,6 | 21,4±0,7 | 22,2±0,9 | 21,6±0,9 | 20,9±1,1 |
| 4                                                                                                                                                                                                                                                          | 26,3±0,5 | 25,8±0,6 | 25,7±0,5 | 22,8±0,8 | 21,6±1,0 | 21,5±0,6 | 20,6±0,7 | 21,2±0,8 |
| Comments:<br>*Start of Начало HFD and HFD<br>**Streptozotocin administration<br>***Start of BP-Cx-1 or its fraction administration<br><i>Italic</i> : significant deviation with group 1<br><b>Bold</b> : significant deviation of groups 3-4 with group 2 |          |          |          |          |          |          |          |          |

**Table S6.** Fluid and food intake in female mice with induced NAFLD accompanied by type 2 diabetes

| Group                                                          | Week                                 |               | 0       | 1       | 2*      | 3       | 4       | 5              |
|----------------------------------------------------------------|--------------------------------------|---------------|---------|---------|---------|---------|---------|----------------|
| 1                                                              | Fluid intake, ml/mouse/day           |               | 3,4±0,2 | 3,4±0,1 | 3,5±0,2 | 3,7±0,1 | 3,9±0,1 | 3,9±0,1        |
|                                                                | Intake of standard feed, g/mouse/day |               | 2,8±0,5 | 2,9±0,3 | 2,9±0,4 | 3,4±0,2 | 3,5±0,1 | 3,5±0,1        |
| 2                                                              | Fluid intake, ml/mouse/day           |               | 2,9±0,2 | 3±0,2   | 4,3±0,9 | 4,5±0,7 | 4,5±0,6 | 3,6±0,3        |
|                                                                | Intake of solid feed, g/mouse/day    | Total         | 2,2±0,1 | -       | 2,2±0,1 | 2±0,1   | 1,9±0,2 | 1,7±0,2        |
|                                                                |                                      | Standard feed | 0,8±0,1 | 0,7±0,1 | 0,7±0,1 | 0,5±0,1 | 0,5±0,1 | 0,4±0,1        |
|                                                                |                                      | Lard          | 1,5±0,1 | -       | 1,5±0,1 | 1,5±0,1 | 1,4±0,1 | 1,3±0,1        |
| 3                                                              | Fluid intake, ml/mouse/day           |               | 2,6±0,2 | 2,7±0,2 | 3,9±0,8 | 3,8±0,7 | 3,6±0,6 | 2,6±0,2        |
|                                                                | Intake of solid feed, g/mouse/day    | Total         | 2,1±0,1 | -       | 2,1±0,1 | 1,8±0,1 | 1,8±0,1 | 1,7±0,1        |
|                                                                |                                      | Standard feed | 0,8±0,1 | 0,7±0,1 | 0,6±0,1 | 0,4±0,1 | 0,5±0,1 | 0,4±0,1        |
|                                                                |                                      | Lard          | 0,1±1,5 | -       | 0,1±1,5 | 0,1±1,9 | 0,1±1,6 | 0,1±1,7        |
| 4                                                              | Fluid intake, ml/mouse/day           |               | 2,8±0,2 | 2,9±0,2 | 3,2±0,3 | 3,4±0,2 | 4,3±0,5 | 4,4±0,7        |
|                                                                | Intake of solid feed, g/mouse/day    | Total         | 2,1±0,1 | -       | 2,1±0,1 | 2,1±0,1 | 2,2±0,1 | <b>2,2±0,1</b> |
|                                                                |                                      | Standard feed | 0,9±0,1 | 0,8±0,1 | 0,6±0,1 | 0,6±0,1 | 0,8±0,1 | <b>0,9±0,1</b> |
|                                                                |                                      | Lard          | 1,4±0,1 | -       | 1,4±0,1 | 1,5±0,1 | 1,3±0,1 | 1,4±0,1        |
| Comments:                                                      |                                      |               |         |         |         |         |         |                |
| * Streptozotocin administration                                |                                      |               |         |         |         |         |         |                |
| <i>Italic</i> : significant deviation with group 1             |                                      |               |         |         |         |         |         |                |
| <b>Bold</b> : significant deviation of groups 3-4 with group 2 |                                      |               |         |         |         |         |         |                |

**Table S7.** Results of a final clinical blood analysis of female mice with induced NAFLD accompanied by type 2 diabetes

| Groups | Leukocytes    | Lymphocytes      | Monocytes      | Granulocytes    | Erythrocytes    | Hemoglobin | Hematocrits     | Thrombocytes | MCHC         |
|--------|---------------|------------------|----------------|-----------------|-----------------|------------|-----------------|--------------|--------------|
|        | WBC<br>10^9/L | Lymph#<br>10^9/L | Mon#<br>10^9/L | Gran#<br>10^9/L | RBC<br>10^12/L  | HGB<br>g/L | HCT %           | PLT 10^9/L   | MCHC,<br>g/L |
| 1      | 3,5±0,2       | 2,3±0,1          | 0,1±0,02       | 1,1±0,1         | 10,3±0,1        | 150,2±1,5  | 46,4±0,3        | 968,4±62,1   | 323,4±1,8    |
| 2      | 7,2±1,6       | 2,3±0,6          | 0,3±0,1        | 3,9±1,3         | <i>11,2±0,1</i> | 165,3±8    | <i>50,5±0,9</i> | 1247,8±124,7 | 326,8±14,5   |
| 3      | 12,5±6,2      | 4,2±0,6          | 0,5±0,3        | 7,8±5,4         | <b>10,6±0,2</b> | 152,8±2,1  | <b>46,9±0,7</b> | 1007,8±101,2 | 325,3±3,5    |
| 4      | 4,3±0,5       | 2,2±0,3          | 0,1±0,02       | 1,9±0,2         | <b>10,3±0,1</b> | 152,4±4,4  | <b>45,9±0,3</b> | 1140,4±72,2  | 331,4±8,2    |

Comments:  
*Italic:* significant deviation with group 1  
**Bold:** significant deviation of groups 3-4 with group 2

**Table S8.** The most frequent scaffolds in a CoCoNut subset (standardized  $C_xH_yO_z$  compounds, CoCoNut  $C_xH_yO_z$ ), a subset of ChEMBL compounds interfering with an Nrf2 pathway (ChEMBL Nrf2), and generated compounds.

| CoCoNut C <sub>x</sub> H <sub>y</sub> O <sub>z</sub>                                |      | ChEMBL Nrf2                                                                         |     | generated compounds                                                                   |     |
|-------------------------------------------------------------------------------------|------|-------------------------------------------------------------------------------------|-----|---------------------------------------------------------------------------------------|-----|
| Scaffolds                                                                           |      |                                                                                     |     |                                                                                       |     |
| Scaffold                                                                            | %    | Scaffold                                                                            | %   | Scaffold                                                                              | %   |
|    | 3.3  |    | 4.9 |    | 6.3 |
|    | 1.0  |    | 3.8 |    | 5.2 |
|    | 0.68 |   | 1.9 |    | 1.0 |
|  | 0.67 |  | 1.6 |  | 1.0 |
|  | 0.58 |  | 1.5 |  | 0.6 |
